# The structural connectome constrains fast brain dynamics

Sorrentino P<sup>1,2</sup>□, Seguin C<sup>3</sup>, Rucco R<sup>4,5</sup>, Liparoti M<sup>4,5</sup>, Troisi Lopez E<sup>4,5</sup>, Bonavita S<sup>6</sup>,  
Quarantelli M<sup>7</sup>, Sorrentino G<sup>2,4,5</sup>, Jirsa V<sup>1\*</sup> & Zalesky A<sup>3\*</sup>

\* Co-senior authors

□ Corresponding author: pierpaolo.SORRENTINO@univ-amu.fr

1. Aix-Marseille University, Inserm, INS, Institut de Neurosciences des Systèmes, Marseille, France
2. Institute of Applied Sciences and Intelligent Systems, National Research Council, Pozzuoli, Italy
3. University of Melbourne, Melbourne, Australia
4. Department of Motor Sciences and Wellness, Parthenope University of Naples, Naples, Italy
5. Institute for Diagnosis and Cure Hermitage Capodimonte, Naples, Italy
6. University of Campania Luigi Vanvitelli. Caserta, Italy
7. Biostructure and Bioimaging Institute, National Research Council, Naples, Italy

## Abstract

Brain activity during rest displays complex, rapidly evolving patterns in space and time. Structural connections comprising the human connectome are hypothesized to impose constraints on the dynamics of this activity. Here, we use magnetoencephalography (MEG) to quantify the extent to which fast neural dynamics in the human brain are constrained by structural connections inferred from diffusion MRI tractography. We characterize the spatio-temporal unfolding of whole-brain activity at the millisecond scale from source-reconstructed MEG data, estimating the probability that any two brain regions will significantly deviate from baseline activity in consecutive time epochs. We find that the structural connectome relates to, and likely affects, the rapid spreading of neuronal avalanches, evidenced by a significant association between these transition probabilities and structural connectivity strengths ( $r=0.37$ ,  $p<0.0001$ ). This finding opens new avenues to study the relationship between brain structure and neural dynamics.

35 **Keywords:** brain dynamics, brain networks, magnetoencephalography, neuronal avalanches,  
36 structural connectome

## 37 **Introduction**

38 The structural scaffolding of the human connectome (1) constrains the unfolding of large-scale  
39 coordinated neural activity towards a restricted *functional repertoire* (2). While functional magnetic  
40 resonance imaging (fMRI) can elucidate this phenomenon at relatively slow timescales (3–5), brain  
41 activity shows rich dynamic behaviour across multiple timescales, with faster activity nested within  
42 slower scales. Here, in healthy young adults, we exploit the high temporal resolution of resting-state  
43 magnetoencephalography (MEG) data to study the spatial spread of perturbations of local  
44 activations representative of neuronal avalanches. We aim to establish whether the structural  
45 connectome constrains the spread of avalanches among regions (6, 7). We find that avalanche  
46 spread is significantly more likely between pairs of grey matter regions that are structurally  
47 connected, as inferred from diffusion MRI tractography. This result provides cross-modal empirical  
48 evidence suggesting that connectome topology constrains fast-scale transmission of neural  
49 information, linking brain structure to brain dynamics.

## 50 **Results**

51 Structural connectomes were mapped for 58 healthy adults (26 females, mean age  $\pm$  SD: 30.72  $\pm$   
52 11.58) using diffusion MRI tractography and regions defined based on the Automated Anatomical  
53 Labeling (AAL) and the Desikan-Killiany-Tourville (DKT) atlases. Interregional streamline counts  
54 derived from whole-brain deterministic tractography quantified the strength of structural  
55 connectivity between pairs of regions. Streamline counts were normalized by regional volume.  
56 Group-level connectomes were computed by averaging connectivity matrices across participants.

57 MEG signals were pre-processed and source reconstructed for both the AAL and DKT atlases. All  
58 analyses were conducted on source-reconstructed signal amplitudes. Each signal amplitude was z-  
59 scored and binarized such that, at any time point, a z-score exceeding a given threshold was set to 1  
60 (active); all other timepoints were set to 0 (inactive). An avalanche was defined as starting when  
61 any region exceeded this threshold, and finished when no region was active. An avalanche-specific  
62 transition matrix (TM) was calculated, where element  $(i, j)$  represented the probability that region  $j$   
63 was active at time  $t + \Delta$ , given that region  $i$  was active at time  $t$ , where  $\Delta \sim 3$ ms. The TMs were  
64 averaged per participant, and then per group, and finally symmetrized. Fig.1 provides an overview  
65 of the pipeline.

66 We found striking evidence of an association between avalanche transition probabilities and  
67 structural connectivity strengths (Fig. 2), suggesting that regional propagation of fast-scale neural  
68 avalanches is partly shaped by the axonal fibers forming the structural connectome ( $r=0.40$ ,  
69  $p<0.0001$ ). Specifically, the association was evident for different activation thresholds and both the  
70 AAL and DKT connectomes (AAL atlas: for threshold  $z=2.5$ ,  $r=0.41$ ; for threshold  $z=3.0$ ,  $r=0.40$ ;  
71 for threshold  $z=3.5$ ,  $r=0.39$ ; DKT atlas: for threshold  $z=2.5$ ,  $r=0.38$ ; for threshold  $z=3.0$ ,  $r=0.37$ ; for  
72 threshold  $z=3.5$ ,  $r=0.35$ ; in all cases,  $p < 0.0001$ ), as well as for individual- and group-level  
73 connectomes, although associations were stronger for group-level analyses (see Fig. 2, panel A).

74 We also investigated this phenomenon within specific frequency bands. Associations were evident  
75 in all the classical frequency bands: delta (0.5 – 4 Hz;  $r=0.39$ ), theta (4 – 8 Hz;  $r=0.29$ ), alpha (8 –  
76 13 Hz;  $r=0.32$ ), beta (13 – 30 Hz;  $r=0.32$ ), and gamma (30 – 48 Hz;  $r=0.32$ ), with  $p<0.0001$  for all  
77 bands (see Supplementary File 1). Supplementary analyses suggested that these results could not be  
78 attributable to volume conduction confounds (see Methods; Field spread analysis).

79

80 Next, we sought to test whether the associations were weaker for randomized transition matrices  
81 computed after randomizing the times of each avalanche while keeping the spatial structure  
82 unchanged. Randomized transition matrices resulted in markedly weaker associations with  
83 structural connectivity, compared to the actual transition matrices (AAL atlas,  $z$ -score=3: mean  $r =$   
84  $0.26$ , observed  $r= 0.40$ ,  $p<0.001$ ). Note that the mean correlation coefficient was greater than zeros  
85 for the randomized data because the randomization process preserved basic spatial attributes in the  
86 data. We also found that the findings remained significant after excluding subcortical regions (with  
87 lower signal-to-noise ratios). Finally, we replicated these findings for a group-level connectome  
88 derived using diffusion MRI acquired from 200 healthy adults in the Human Connectome Project  
89 ( $r=0.11$ ,  $p<0.001$ ,  $z$ -score=3; see Methods). Our results were thus robust to multiple connectome  
90 mapping pipelines and parcellation atlases, significant for both group-averaged and individual  
91 connectomes, and could not be explained by chance transitions and/or volume conduction effects.  
92 Collectively, these results suggest that connectome organization significantly shapes the  
93 propagation of neural activity.

## 94 **Discussion**

95 Our results provide new insight into the propagation of fast-evolving brain activity in the human  
96 connectome. We show that the spatial unfolding of neural dynamics at the millisecond scale relates  
97 to the network of large-scale axonal projections comprising the connectome, likely constraining the  
98 exploration of the brain's putative functional repertoire. The short time scale of several milliseconds  
99 biases the constraint to direct connections, which is the focus of this paper. Longer delays may  
100 impose constraints upon larger-scale motifs of the network and further characterize the sub-spaces,  
101 in which brain dynamics unfold.

102 Previous functional MRI studies provide evidence of coupling between structural connectivity and  
103 slow activations (3, 8, 9). However, intrinsic neural dynamics evolve quickly and are nested within  
104 slow activity (10). Our findings suggest that long-term structure-function coupling occurs against a  
105 backdrop of faster fluctuations, which are also constrained by the connectome and may enable  
106 individuals to rapidly respond to changing environments and new cognitive demands (11).

107 Consistent with our findings, two recent M/EEG studies showed that functional connectivity, as  
108 estimated using amplitude-envelope coupling (AEC), relates to structural connectivity (12, 13).  
109 However, in contrast to AEC, we conducted time-resolved analyses, characterizing avalanche  
110 dynamics at high temporal resolution. Further work is needed to determine the extent to which  
111 structure-function coupling is dynamic. To this regard, our results suggest that coupling is strongest  
112 during avalanche events, consistent with established theories (14). Finally, our results might explain  
113 how the large-scale activity unfolding in time might lead to the previous observation that average  
114 resting-state functional connectivity displays topological features that mirror those of the structural  
115 connectome (15). Our proposed framework links the large-scale spreading of aperiodic, locally  
116 generated perturbations to the structural connectome, and might be further exploited to investigate  
117 polysynaptic models of network communication, which aim to describe patterns of signalling  
118 between anatomically unconnected regions (16, 17). In fact, our results show that transitions of  
119 activations are observed across regions that do not appear to be directly linked in the structural  
120 connectome. This provides evidence for polysynaptic communication.

121 Neuronal avalanches have been previously observed in MEG data (7), and their statistical  
122 properties, such as a size distribution that obeys a power-law with an exponent of  $-3/2$ , reported.  
123 These features are compatible with those that would be predicted starting from a process operating  
124 at criticality with a branching ratio equal to one. While beyond the scope of this paper, our  
125 framework might contribute to elucidating the role of the structural scaffolding (and its topological  
126 properties) to the emergence of the observed large-scale, scale-free critical dynamics. In turn, this

127 might be exploited to predict the effects of structural lesions on behaviour and/or clinical  
128 phenotypes.

129 While our findings were replicated across multiple frequency bands, structural connectivity can  
130 potentially impose frequency-dependent constraints on avalanche spread. Future work should  
131 investigate frequency-specific data to understand what leads to the emergence of avalanches and,  
132 most importantly, to the specific spatio-temporal patterns of recruited regions that defines  
133 individual (or at least groups of) avalanches in each specific frequency-band.

134 For the present application, we reconstructed the structural connectome using a deterministic  
135 tractography algorithm. While probabilistic algorithms can provide advantages in some  
136 applications, they are prone to reconstruction of spurious connections (false positives), compared to  
137 deterministic methods, reducing connectome specificity (18, 19). We used deterministic  
138 tractography because previous functional MRI studies report that structure-functional coupling is  
139 greater for connectivity matrices inferred from deterministic tractography, compared to probabilistic  
140 methods (20). Nonetheless, additional studies are needed to clarify if and to what extent the present  
141 results are influenced by the structural connectome reconstruction method. While we replicated our  
142 findings using alternative datasets (i.e. HCP) and parcellations, further replication using alternative  
143 connectome mapping pipelines is warranted.

144 In conclusion, using MEG to study fast neuronal dynamics and diffusion MRI tractography to map  
145 connectomes, we found that the connectome significantly constrains the spatial spread of neuronal  
146 avalanches to axonal connections. Our results suggest that large-scale structure-function coupling is  
147 dynamic and peaks during avalanche events.

## 148 **Methods**

### 149 **Participants**

150 We recruited 58 young adults (male 32 / female 26, mean age  $\pm$  SD was  $30.72 \pm 11.58$ ) from the  
151 general community. All participants were right-handed and native Italian speakers. The inclusion  
152 criteria were: 1) no major internal, neurological or psychiatric illnesses; 2) no use of drugs or  
153 medication that could interfere with MEG/MRI signals. The study complied with the Declaration of  
154 Helsinki and was approved by the local Ethics Committee. All participants gave written informed  
155 consent.

156

## 157 **MRI acquisition**

158 3D T1-weighted brain volumes were acquired at 1.5 Tesla (Signa, GE Healthcare) using a 3D  
159 Magnetization-Prepared Gradient-Echo BRAVO sequence (TR/TE/TI 8.2/3.1/450 ms, voxel  $1 \times 1 \times$   
160  $1 \text{ mm}^3$ , 50% partition overlap, 324 sagittal slices covering the whole brain), and diffusion MRI data  
161 for individual c connectome reconstruction were obtained using the following parameters: Echo-  
162 Planar Imaging, TR/TE 12,000/95.5 ms, voxel  $0.94 \times 0.94 \times 2.5 \text{ mm}^3$ , 32 diffusion-sensitizing  
163 directions, 5 B0 volumes). The MRI scan was performed after the MEG recording. Preprocessing  
164 of the diffusion MRI data was carried out using the software modules provided in the FMRIB  
165 Software Library (FSL, <http://fsl.fmrib.ox.ac.uk/fsl>). All diffusion MRI datasets were corrected for  
166 head movements and eddy currents distortions using the "eddy\_correct" routine, rotating diffusion  
167 sensitizing gradient directions accordingly, and a brain mask was obtained from the B0 images  
168 using the Brain Extraction Tool routine. A diffusion-tensor model was fitted at each voxel, and  
169 streamlines were generated over the whole brain by deterministic tractography using Diffusion  
170 Toolkit (FACT propagation algorithm, angle threshold  $45^\circ$ , spline-filtered, masking by the FA maps  
171 thresholded at 0.2). For tractographic analysis, the ROIs of the AAL atlas and of a MNI space-  
172 defined volumetric version of the Desikan-Killiany-Tourville (DKT) ROI atlas were used, both  
173 masked by the GM tissue probability map available in SPM (thresholded at 0.2). To this end, for  
174 each participant, FA volumes were normalized to the MNI space using the FA template provided by  
175 FSL, using the spatial normalization routine available in SPM12, and the resulting normalization  
176 matrices were inverted and applied to the ROIs, to apply them onto each subject. The quality of the  
177 normalization was assessed visually. From each subject's whole brain tractography and  
178 corresponding GM ROI set, the number of streamlines connecting each couple of GM ROIs and the  
179 corresponding mean tract length was calculated using an in-house software written in Interactive  
180 Data Language (IDL, Harris Geospatial Solutions, Inc., Broomfield, CO, USA).

181 Connectomes in the replication dataset were constructed using an alternative mapping pipeline and  
182 diffusion MRI data from the Human Connectome Project (HCP). Deterministic tractography was  
183 performed using MRtrix3 (21) under the following parameters: FACT algorithm, 5 million  
184 streamlines, 0.5 mm propagation step size, 400 mm maximum propagation length, and 0.1 FA  
185 threshold for the termination of streamlines (17). The number of streamlines connecting any couple  
186 of regions was normalized by the combined volume of the two regions. Structural matrices were  
187 constructed for 200 HCP participants using the AAL atlas and averaged to derive a group-level  
188 connectome.

189

## 190 **MEG pre-processing**

191 MEG pre-processing and source reconstruction were performed as in (22). The MEG system was  
192 equipped with 163 magnetometers, and was developed by the National Research Council of Italy at  
193 the Institute of Applied Sciences and Intelligent Systems (ISASI). All technical details regarding the  
194 MEG device are reported in (23). In short, the MEG registration was divided in two eyes-closed  
195 segments of 3:30 minutes each. To identify the position of the head, four anatomical points and four  
196 position coils were digitized. Electrocardiogram (ECG) and electro-oculogram (EOG) signals were  
197 also recorded. The MEG signals, after an anti-aliasing filter, were acquired at 1024 Hz, then a  
198 fourth order Butterworth IIR band-pass filter in the 0.5-48 Hz band was applied. To remove  
199 environmental noise, measured by reference magnetometers, we used Principal Component  
200 Analysis. We adopted supervised Independent Component Analysis to clean the data from  
201 physiological artifacts, such as eye blinking (if present) and heart activity (generally one  
202 component). Noisy channels were identified and removed manually by an expert rater ( $136 \pm 4$   
203 sensors were kept). 47 subjects were selected for further analysis.

## 204 **Source reconstruction**

205 The time series of neuronal activity were reconstructed in 116 regions of interests (ROIs) based on  
206 the Automated Anatomical Labeling (AAL) atlas (24, 25); and in 84 regions of interest based on the  
207 Desikan-Killiany-Tourreville (DKT) atlas. To do this, we used the volume conduction model  
208 proposed by Nolte (26) applying the Linearly Constrained Minimum Variance (LCMV)  
209 beamformer algorithm (27) based on the native structural MRIs. Sources were reconstructed for the  
210 centroids of each ROI. Finally, we considered a total of 90 ROIs for the AAL atlas, since we have  
211 excluded 26 ROIs corresponding to the cerebellum because of their low reliability in MEG (28). All  
212 the preprocessing steps and the source reconstruction were made using the Fieldtrip toolbox (29).

## 213 **Neuronal avalanches and branching parameter**

214 To study the dynamics of brain activity, we estimated “neuronal avalanches”. Firstly, the  
215 time series of each ROI was discretized calculating the z-score, then positive and negative  
216 excursions beyond a threshold were identified. The value of the threshold was set to 3 standard  
217 deviations ( $|z| = 3$ ), but we tested the robustness of the results changing this threshold from 2.5 to  
218 3.5. A neuronal avalanche begins when, in a sequence of contiguous time bins, at least one ROI is  
219 active ( $|z| > 3$ ), and ends when all ROIs are inactive (30, 31). The total number of active ROIs in an  
220 avalanche corresponds to its size.



221 These analyses require the time series to be binned. This is done to ensure that one is capturing  
222 critical dynamics, if present. To estimate the suitable time bin length, for each subject, for each  
223 neuronal avalanches and for each time bin duration, the branching parameter  $\sigma$  was estimated (32,  
224 33). In fact, system operating at criticality typically display a branching ratio  $\sim 1$ . The branching  
225 ratio is calculated as the geometrically averaged (over all the time bins) ratio of the number of  
226 events (activations) between the subsequent time bin (descendants) and that in the current time bin  
227 (ancestors) and then averaging it over all the avalanches (34). More specifically:

228

$$229 \quad \sigma_i = \frac{1}{N_{bin}-1} \prod_{j=1}^{N_{bin}-1} \left( \frac{n_{events}(j+1)}{n_{events}(j)} \right)^{\frac{1}{N_{bin}-1}} \quad (1)$$

230

$$231 \quad \sigma = \frac{1}{N_{aval}} \prod_{i=1}^{N_{aval}} (\sigma_i)^{\frac{1}{N_{aval}}} \quad (2)$$

232

233 Where  $\sigma_i$  is the branching parameter of the  $i$ -th avalanche in the dataset,  $N_{bin}$  is the total amount of  
234 bins in the  $i$ -th avalanche,  $n_{events}(j)$  is the total number of events active in the  $j$ -th bin,  $N_{aval}$  is the  
235 total number of avalanche in the dataset. We tested bins from 1 to 5, and picked 3 for further  
236 analyses, given that the branching ratio was 1 for bin =3. However, results are unchanged for other  
237 bin durations, and the branching ratio remains equal to 1 or differences were minimal (range: 0.999  
238 to 1.010 - data not shown). Bins of longer duration would violate the Nyquist criterion and were  
239 thus not considered. The results shown are derived when taking into accounts avalanches longer  
240 than 10 time bins. However, we repeated the analysis taking into account avalanches longer than 30  
241 time bins, as well as taking all avalanches into account, and the results were unchanged.

242

243

## 244 **Transition matrices**

245 The amplitude of each binned, z-scored source-reconstructed signal was binarized, such that, at any  
246 time bin, a z-score exceeding  $\pm 3$  was set to 1 (active); all other time bins were set to 0 (inactive).  
247 Alternative z-score thresholds (i.e. 2.5 and 3.5) were tested. An avalanche was defined as starting  
248 when any region is above threshold, and finishing when no region is active, as in (22). Avalanches  
249 shorter than 10 time bins ( $\sim 30$  msec) were excluded. However, the analyses were repeated including



250 only avalanches longer than 30 time bins (~90 msec), to focus on rarer events (sizes of the neuronal  
251 avalanches have a fat-tailed distribution) that are highly unlikely to be noise, and including all  
252 avalanches, and the results were unchanged. An avalanche-specific transition matrix (TM) was  
253 calculated, where element  $(i, j)$  represented the probability that region  $j$  was active at time  $t + \Delta$ ,  
254 given that region  $i$  was active at time  $t$ , where  $\Delta \sim 3$ ms. The TMs were averaged per participant, and  
255 then per group, and finally symmetrized. The introduction of a time-lag makes it unlikely that our  
256 results can be explained trivially by volume conduction (i.e. the fact that multiple sources are  
257 detected simultaneously by multiple sensors, generating spurious zero-lags correlations in the  
258 recorded signals). For instance, for a binning of 3, as the avalanches proceed in time, the successive  
259 regions that are recruited do so after roughly 3 msec (and 5 msec for the binning of 5). Hence,  
260 activations occurring simultaneously do not contribute to the estimate of the transition matrix. See  
261 below for further analyses addressing the volume conduction issue. Finally, we explored transition  
262 matrices estimated using frequency-specific signals. To this end, we filtered the source-  
263 reconstructed signal in the classical frequency bands (delta, 0.5 – 4 Hz; theta 4 – 8 Hz; alpha 8 – 13  
264 Hz; beta 13 – 30 Hz; gamma 30 – 48 Hz), before computing neuronal avalanches and the transition  
265 matrix, by applying a fourth-order Butterworth pass-band filter to the source-reconstructed data,  
266 before proceeding to the further analysis as previously described. The results remained significant  
267 in all the explored frequency bands. This analysis was carried out for the DKT atlas, binning = 3, z-  
268 score threshold =  $\pm 3$ .

269

## 270 Field spread analysis

271 Volume conduction alone is an unlikely explanation of our results, given that simultaneous  
272 activations do not contribute to the transition matrix, due to the time lags introduced. To confirm  
273 that volume conduction effects were negligible, the transition matrices were re-computed using  
274 longer delays. In short, we identified the regions that were recruited in an avalanche after the first  
275 perturbation (i.e. the initial time-bin of an avalanche). Since we did not scroll through the avalanche  
276 in time, as previously described, we considered time delays as long as the avalanche itself, while  
277 minimizing the influence of short delays. This means that the avalanche-specific transition matrix is  
278 now binary, and the  $ij^{th}$  element is equal to 1 if region  $i$  started the avalanche (i.e. it was active at the  
279 first time-bin) and region  $j$  was recruited in the avalanche at any subsequent timepoint, and 0  
280 otherwise. This alternative procedure for the estimation of the transition matrices was carried out  
281 for the AAL atlas, in the case of binning = 3, z-score threshold =  $\pm 3$ . In this case, a significant

282 association remained between transition probabilities and structural connectivity ( $r=0.36$ ;  
283  $p<0.0001$ ). Figure 2–figure supplement 1 provides further details.

284 To further rule out the possibility that field spread might introduce spurious correlations that might  
285 drive the relationship between the Transition Matrix and the structural connectivity matrix, we  
286 conducted further analyses involving surrogate data. We generated  $n$  white Gaussian processes,  
287 with  $n = 66$ , i.e. the number of cortical regions, and we smoothed them using a zero-phase  
288 polynomial filter. Then, we added 100 perturbations, where each perturbation was assigned to a  
289 randomly chosen regions and random time point, subject to the following constraints. Perturbations  
290 were separated by at least 200 samples (no overlap was allowed, i.e. the perturbations could only  
291 occur in one region at a time), their length was randomly selected among 5, 10 or 100 samples, their  
292 amplitude between 50 and 400. This procedure was carried out 47 times, to obtain an independent  
293 surrogate dataset for each one of the 47 participants, that will be referred to as the “uncoupled”  
294 dataset. The uncoupled dataset was then transformed using the subject-specific leadfield matrix,  
295 yielding new surrogate sensor-level timeseries, where each sensor is a weighted sum of all the  
296 sources, according to the same leadfield matrix that was used to reconstruct the real data. Noise,  
297 correlated as  $1/\text{distance among sensors}$ , was then added to the sensor-level time series, with a SNR  
298 = 4. Then, new source-reconstructed time series were computed for each subject. Based on these  
299 new time series, we performed the same procedure to compute the transition matrix as described  
300 above. Specifically, we z-scored the time series, thresholded them (threshold  $z=\pm 3$ ), retrieved the  
301 avalanche-specific transition matrices, averaged these within each subject and then across the  
302 group, and finally symmetrized the matrix. We then investigated the extent of correlation between  
303 the new transition matrix and the structural connectivity matrix. We repeated the entire procedure  
304 reported above one hundred times, and show that is unlikely that linear mixing alone can explain  
305 the significant association between transition probabilities and structural connectivity ( $p < 0.001$ ).

306

### 307 **Statistical analysis**

308 The Spearman rank correlation coefficient was used to assess the association between transition  
309 probabilities and structural connectivity. A correlation coefficient was computed separately for each  
310 individual across all pairs of regions. Transition matrices were symmetrized before this  
311 computation. Randomized transition matrices were generated to ensure that associations between  
312 transition probabilities and structural connectivity could not be attributed to chance. Avalanches  
313 were randomized across time, without changing the order of active regions at each time step. We  
314 generated a total of 1000 randomized transition matrices and the Spearman rank correlation

315 coefficient was computed between each randomized matrix and structural connectivity. This yielded  
316 a distribution of correlation coefficients under randomization. The proportion of correlation  
317 coefficients that were greater than, or equal to, the observed correlation coefficient provided a p-  
318 value for the null hypothesis that structure-function coupling was attributable to random transition  
319 events.

## 320 **Bibliography**

- 321 1. O. Sporns, G. Tononi, R. Kötter, The Human Connectome: A Structural Description of the  
322 Human Brain. *PLoS Comput. Biol.* **1**, e42 (2005).
- 323 2. G. Deco, V. K. Jirsa, A. R. McIntosh, Emerging concepts for the dynamical organization of  
324 resting-state activity in the brain. *Nat. Rev. Neurosci.* **12**, 43–56 (2011).
- 325 3. C. J. Honey, R. Kötter, M. Breakspear, O. Sporns, Network structure of cerebral cortex shapes  
326 functional connectivity on multiple time scales. *Proc. Natl. Acad. Sci. U. S. A.* **104**, 10240–5  
327 (2007).
- 328 4. J. Goni, *et al.*, Resting-brain functional connectivity predicted by analytic measures of network  
329 communication. *Proc. Natl. Acad. Sci. U. S. A.* **111**, 833–838 (2014).
- 330 5. A. Zalesky, A. Fornito, L. Cocchi, L. L. Gollo, M. Breakspear, Time-resolved resting-state  
331 brain networks. *Proc. Natl. Acad. Sci. U. S. A.* **111**, 10341–6 (2014).
- 332 6. J. M. Beggs, D. Plenz, Neuronal Avalanches Are Diverse and Precise Activity Patterns That  
333 Are Stable for Many Hours in Cortical Slice Cultures. *J. Neurosci.* **24**, 5216–5229 (2004).
- 334 7. O. Shriki, *et al.*, Neuronal avalanches in the resting MEG of the human brain. *J. Neurosci.* **33**,  
335 7079–7090 (2013).
- 336 8. C. J. Honey, J. P. Thivierge, O. Sporns, Can structure predict function in the human brain?  
337 *NeuroImage* **52**, 766–776 (2010).
- 338 9. C. J. Honey, *et al.*, Predicting human resting-state functional connectivity from structural  
339 connectivity. *Proc. Natl. Acad. Sci. U. S. A.* **106**, 2035–2040 (2009).
- 340 10. M. L. Saggio, A. Spiegler, C. Bernard, V. K. Jirsa, Fast–Slow Bursters in the Unfolding of a  
341 High Codimension Singularity and the Ultra-slow Transitions of Classes. *J. Math. Neurosci.* **7**,  
342 1–47 (2017).
- 343 11. A. McIntosh, V. Jirsa, The hidden repertoire of brain dynamics and dysfunction. *Netw.*  
344 *Neurosci.* **3** (2019).
- 345 12. K. Glomb, *et al.*, Using structural connectivity to augment community structure in EEG  
346 functional connectivity. *Netw. Neurosci.* **4**, 761–787 (2020).
- 347 13. P. Tewarie, *et al.*, How do spatially distinct frequency specific MEG networks emerge from  
348 one underlying structural connectome? The role of the structural eigenmodes. *NeuroImage*  
349 **186**, 211–220 (2019).
- 350 14. S. Dehaene, M. Kerszberg, J.-P. Changeux, A neuronal model of a global workspace in  
351 effortful cognitive tasks. *Proc. Natl. Acad. Sci.* **95**, 14529–14534 (1998).
- 352 15. E. Bullmore, O. Sporns, Complex brain networks: graph theoretical analysis of structural and  
353 functional systems. *Nat. Rev. Neurosci.* **10**, 186–198 (2009).
- 354 16. C. Seguin, M. P. Van Den Heuvel, A. Zalesky, Navigation of brain networks. *Proc. Natl.*  
355 *Acad. Sci. U. S. A.* **115**, 6297–6302 (2018).

- 356 17. C. Seguin, A. Razi, A. Zalesky, Inferring neural signalling directionality from undirected  
357 structural connectomes. *Nat. Commun.* **10**, 1–13 (2019).
- 358 18. T. Sarwar, K. Ramamohanarao, A. Zalesky, Mapping connectomes with diffusion MRI:  
359 deterministic or probabilistic tractography? *Magn. Reson. Med.* **81**, 1368–1384 (2019).
- 360 19. A. Zalesky, *et al.*, Connectome sensitivity or specificity: which is more important?  
361 *NeuroImage* **142**, 407–420 (2016).
- 362 20. P. M. Abeyasinghe, M. Aiello, C. Cavaliere, A. M. Owen, A. Soddu, A comparison of  
363 diffusion tractography techniques in simulating the generalized Ising model to predict the  
364 intrinsic activity of the brain. *Brain Struct. Funct.* **226**, 817–832 (2021).
- 365 21. J. D. Tournier, *et al.*, MRtrix3: A fast, flexible and open software framework for medical  
366 image processing and visualisation. *NeuroImage* **202**, 116137 (2019).
- 367 22. P. Sorrentino, *et al.*, Flexible brain dynamics underpins complex behaviours as observed in  
368 Parkinson’s disease. *Sci. Rep.* **11**, 4051 (2021).
- 369 23. S. Rombetto, C. Granata, A. Vettoliere, M. Russo, Multichannel System Based on a High  
370 Sensitivity Superconductive Sensor for Magnetoencephalography. *Sensors* **14**, 12114–12126  
371 (2014).
- 372 24. N. Tzourio-Mazoyer, *et al.*, Automated anatomical labeling of activations in SPM using a  
373 macroscopic anatomical parcellation of the MNI MRI single-subject brain. *NeuroImage* **15**,  
374 273–89 (2002).
- 375 25. A. Hillebrand, *et al.*, Direction of information flow in large-scale resting-state networks is  
376 frequency-dependent. *Proc. Natl. Acad. Sci. U. S. A.* (2016)  
377 <https://doi.org/10.1073/pnas.1515657113>.
- 378 26. G. Nolte, The magnetic lead field theorem in the quasi-static approximation and its use for  
379 magnetoencephalography forward calculation in realistic volume conductors. *Phys. Med. Biol.*  
380 **48**, 3637–3652 (2003).
- 381 27. B. D. Van Veen, W. Van Drongelen, M. Yuchtman, A. Suzuki, Localization of Brain  
382 Electrical Activity via Linearly Constrained Minimum Variance Spatial Filtering. *IEEE Trans.*  
383 *Biomed. Eng.* **44** (1997).
- 384 28. A. Lardone, *et al.*, Mindfulness meditation is related to long-lasting changes in hippocampal  
385 functional topology during resting state: a magnetoencephalography study. *Neural Plast.* **2018**  
386 (2018).
- 387 29. R. Oostenveld, *et al.*, FieldTrip: Open Source Software for Advanced Analysis of MEG, EEG,  
388 and Invasive Electrophysiological Data, FieldTrip: Open Source Software for Advanced  
389 Analysis of MEG, EEG, and Invasive Electrophysiological Data. *Comput. Intell. Neurosci.*  
390 (2011) <https://doi.org/10.1155/2011/156869>, 10.1155/2011/156869.
- 391 30. J. M. Beggs, D. Plenz, Neuronal avalanches in neocortical circuits. *J. Neurosci. Off. J. Soc.*  
392 *Neurosci.* **23**, 11167–77 (2003).
- 393 31. O. Shriki, *et al.*, Neuronal Avalanches in the Resting MEG of the Human Brain. *J. Neurosci.*  
394 **33**, 7079–7090 (2013).

- 395 32. C. Haldeman, J. M. Beggs, Critical Branching Captures Activity in Living Neural Networks  
396 and Maximizes the Number of Metastable States. *Phys. Rev. Lett.* **94**, 058101 (2005).
- 397 33. T. E. Harris, The Theory of Branching Process (1964).
- 398 34. P. Bak, C. Tang, K. Wiesenfeld, Self-organized criticality: An explanation of the 1/f noise.  
399 *Phys. Rev. Lett.* **59**, 381 (1987).

400

401

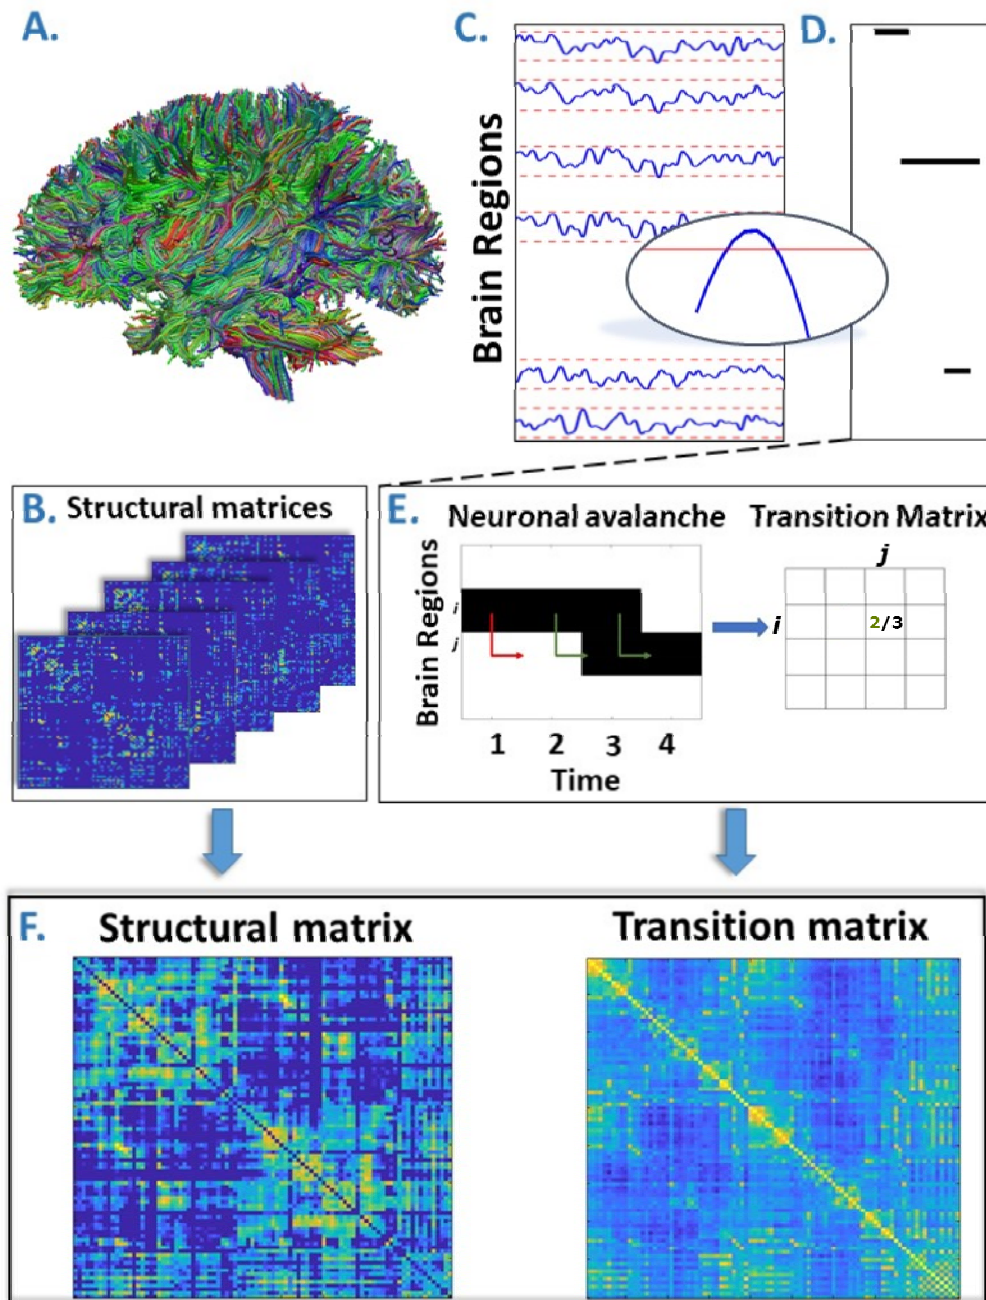

402

403 **Figure 1.** A. Rendering of streamlines reconstructed using diffusion MRI and tractography for an  
404 individual. B. Structural connectivity matrix. Row/columns represent regions comprising a brain  
405 atlas. Matrix entries store the number of streamlines interconnecting each pair of regions. C.  
406 Source-reconstructed MEG series. Each blue line represents the z-scored activity of a region, and  
407 the red lines denote the threshold ( $z\text{-score} = \pm 3$ ). The inset represents a magnified version of a time-  
408 series exceeding the threshold. D. Raster plot of an avalanche. For each region, the moments in time  
409 when the activity is above threshold are represented in black, while the other moments are indicated  
410 in white. The particular avalanche that is represented involved three regions. E. Estimation of the



411 transition matrix of a toy avalanche. Region  $i$  is active three times during the avalanche. In two  
412 instances, denoted by the green arrows, region  $j$  was active after region  $i$ . In one instance, denoted  
413 by the red arrow, region  $i$  is active but region  $j$  does not activate at the following time step. This  
414 situation would result, in the transition matrix, as a  $2/3$  probability. F. Average structural matrix and  
415 average transition matrix (Log scale).

416

417

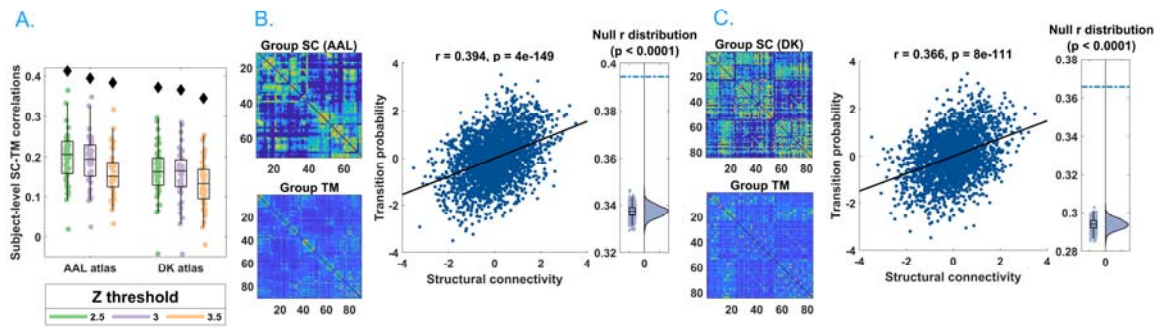

418

419 **Figure 2. A.** Distribution of the  $r$ 's of the Spearman's correlation between the subject-specific  
420 transition matrices and structural connectomes. The black diamond represent the  $r$ 's of the group-  
421 averaged matrices. On the left, the results for the AAL atlas, on the right, the results for the DKT  
422 atlas. Green, purple and orange dots represent results obtained with a  $z$ -score threshold of 2.5, 3 and  
423 3.5, respectively. **B and C.** Data referring to the AAL atlas in B, to the DKT atlas in C. On the top-  
424 left, the average structural matrix, on the bottom left, the average transition matrix. The scatterplot  
425 shows the correlation between the values of the structural edges and the transition probabilities for  
426 the corresponding edge. The black line represents the best fit line in the least-square sense. On the  
427 right, the distribution shows the  $r$ 's derived from the null distribution. The dotted blue line  
428 represents the observed  $r$ . Please note that, for visualization purposes, the connectivity weights and  
429 the transition probabilities were resampled to normal distributions. Figure 2-figure supplement 1  
430 shows the comparison between the structural connectome and the transition matrix computed by  
431 taking into account longer delays. In the Supplementary file 1, we report a table with an overview  
432 of the results of the frequency-specific analysis.

433

434

435

436

437

438

439

440 **Supplementary figure 1.**

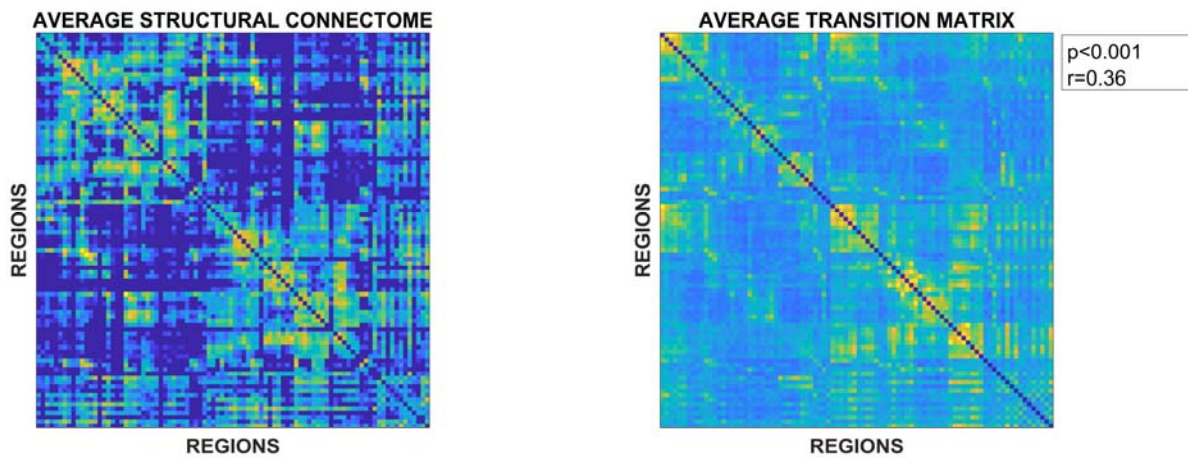

441

442 On the left, the average structural matrix. On the right, the average transition matrix.

443

444 **Supplementary File 1.**

445 **Table.1 Correlations between the structural connectome and frequency-specific transition**  
446 **matrices.**

|                           | <b>R</b>    | <b>p</b>          |
|---------------------------|-------------|-------------------|
| <b>Delta (0.5 – 4 Hz)</b> | <b>0.38</b> | <b>2.021e-120</b> |
| <b>Theta (4 – 8 Hz)</b>   | <b>0.35</b> | <b>5.34e-100</b>  |
| <b>Alpha (8 – 13 Hz)</b>  | <b>0.38</b> | <b>1.46e-116</b>  |
| <b>Beta (13 – 30 Hz)</b>  | <b>0.38</b> | <b>7.30e-122</b>  |
| <b>Gamma (30 – 48 Hz)</b> | <b>0.39</b> | <b>1.32e-123</b>  |

447 Correlations between the structural connectome and frequency-specific transition matrices.

448

449 **Source data File.**

450 The source data file contains the code to generate the transition matrices starting from neuronal avalanches

451 and to compare them to null surrogates.
